# Supplementary material for: Associations of Homocysteine, Folate, and Vitamin B12 with Osteoarthritis: A Mendelian Randomization Study
Source: Nutrients. 2023 Mar 28;15(7):1636. doi: 10.3390/nu15071636 (PMC10096814; doi:10.3390/nu15071636)
Supplement: Supplementary file 1 [file nutrients-15-01636-s001.zip › Supplementary tables.xlsx]

## Sheet:  Table S1
Table S1. Detailed information of the genome-wide association study of OA.
Phenotype	Data sourse	No. of cases	No. of controls	Sample size	Population
Overall OA	11 cohorts of European and 2 cohorts of East Asian	177517	649173	826690	European (99%)
Knee OA	9 cohorts of European and 1 cohorts of East Asian	62497	333557	396054	European (99%)
Hip OA	9 cohorts of European	36445	316943	353388	European
Spine OA	7 cohorts of European and 2 cohorts of East Asian	28372	305578	333950	European (98%)
Hand OA	8 cohorts of European	20901	282881	303782	European
Thumb OA	6 cohorts of European	10536	236919	247455	European

## Sheet:  Table S2
Table S2: Association (P<5×10-8) of SNPs used as candidate genetic instruments for OA at any site with confounders or OA.
Exposure	SNP	Trait	Excluded from MR analysis
homocysteine	rs957140	None	No
	rs9369898	None	No
	rs838133	Total cholesterol,	Yes
	rs7422339	HDL cholesterol, Systolic blood pressure, Weight	Yes
	rs7130284	None	No
	rs548987	Body mass index, Type 1 diabetes	Yes
	rs4660306	None	No
	rs42648	Impedance of arm right	No
	rs2851391	Blood metabolite levels	No
	rs234709	Blood and toenail selenium levels	No
	rs2275565	None	No
	rs2251468	Low density lipoprotein, LDL cholesterol, Total cholesterol	Yes
	rs1801222	None	No
	rs1801133	Diastolic blood pressure	Yes
	rs154657	Self-reported hypertension, Treatment with blood pressure medication	Yes
	rs12921383	Height, Cancer diagnosed by doctor	Yes
	rs12780845	None	No
	rs12134663	None	No
Folate	rs1801133	Diastolic blood pressure	Yes
	rs17421511	None	No
	rs652197	None	No
Vitamin B12	rs602662	Total cholesterol, Self-reported high cholesterol	Yes
	rs5753231	None	No
	rs56077122	None	No
	rs41281112	None	No
	rs34528912	None	No
	rs34324219	Self-reported pernicious anaemia	Yes
	rs2336573	None	No
	rs1801222	None	No
	rs117456053	None	No
	rs1141321	None	No
	rs1131603	Cardiovascular disease prevalence	Yes

## Sheet:  Table S3
Table S3: Results of MR Steiger direction test.
			Overall OA			Knee OA			Hip OA			Spine OA			Hand OA			Thumb OA
Outcome	SNP	rsq.exposure	rsq.outcome	steiger_dir*	steiger_pval	rsq.outcome	steiger_dir*	steiger_pval	rsq.outcome	steiger_dir*	steiger_pval	rsq.outcome	steiger_dir*	steiger_pval	rsq.outcome	steiger_dir*	steiger_pval	rsq.outcome	steiger_dir*	steiger_pval
Homocysteine	rs12134663	0.00190611	7.72705e-06	TRUE	5.56581e-17	1.80753e-06	TRUE	3.21534e-17	7.36842e-06	TRUE	4.80067e-16	8.53756e-06	TRUE	8.3218e-16	1.37033e-06	TRUE	7.00572e-17	9.41637e-07	TRUE	1.36563e-16
	rs12780845	0.000781997	7.01009e-06	TRUE	2.17122e-07	1.19841e-05	TRUE	1.03654e-06	3.25493e-05	TRUE	1.02965e-05	2.00932e-06	TRUE	1.57713e-07	7.85963e-06	TRUE	7.76919e-07	3.14605e-06	TRUE	3.96665e-07
	rs1801222	0.000947779	2.29054e-06	TRUE	2.04259e-09	3.55035e-06	TRUE	8.32124e-09	NA	NA	NA	3.24427e-08	TRUE	1.49109e-09	1.11961e-05	TRUE	7.08394e-08	6.97888e-06	TRUE	5.06052e-08
	rs2275565	0.000820872	5.86587e-07	TRUE	1.13014e-08	6.08102e-07	TRUE	2.75983e-08	2.96182e-07	TRUE	2.55672e-08	1.37825e-06	TRUE	5.72776e-08	1.01005e-05	TRUE	5.6608e-07	1.17865e-05	TRUE	1.04816e-06
	rs234709	0.00237759	1.19087e-07	TRUE	3.43969e-23	8.43827e-09	TRUE	2.81574e-22	3.02905e-09	TRUE	4.63469e-22	7.49364e-07	TRUE	2.9381e-21	6.09036e-07	TRUE	4.20986e-21	2.08857e-06	TRUE	4.93974e-20
	rs2851391	0.00110875	2.73174e-06	TRUE	9.13656e-11	5.65234e-06	TRUE	7.06494e-10	6.04464e-08	TRUE	5.75732e-11	1.52859e-05	TRUE	6.42223e-09	9.98718e-06	TRUE	3.23611e-09	5.71402e-06	TRUE	2.17075e-09
	rs42648	0.000720781	1.48677e-07	TRUE	6.01626e-08	1.16321e-06	TRUE	2.79458e-07	3.00968e-06	TRUE	6.49228e-07	4.20237e-08	TRUE	1.42462e-07	2.80392e-07	TRUE	2.36499e-07	2.84374e-07	TRUE	3.50009e-07
	rs4660306	0.00087402	1.04984e-07	TRUE	2.13155e-09	3.77775e-07	TRUE	7.87812e-09	3.1304e-06	TRUE	3.63575e-08	8.90944e-09	TRUE	5.86018e-09	1.02675e-05	TRUE	2.25851e-07	4.33201e-06	TRUE	1.03273e-07
	rs7130284	0.00206337	1.2319e-06	TRUE	1.10561e-19	7.1824e-06	TRUE	1.53041e-17	1.77016e-05	TRUE	3.05541e-16	1.39193e-07	TRUE	5.48743e-19	2.3827e-07	TRUE	1.06374e-18	1.85174e-07	TRUE	2.91783e-18
	rs9369898	0.00093113	4.21875e-06	TRUE	5.60662e-09	6.41307e-06	TRUE	2.42646e-08	3.88705e-08	TRUE	1.88284e-09	1.60644e-06	TRUE	7.607e-09	1.7946e-06	TRUE	1.00685e-08	2.35105e-07	TRUE	6.09905e-09
	rs957140	0.00071623	4.42489e-06	TRUE	4.43567e-07	1.35575e-06	TRUE	3.34738e-07	1.62266e-06	TRUE	4.40749e-07	4.06754e-09	TRUE	1.34099e-07	2.24228e-07	TRUE	2.43801e-07	1.07682e-05	TRUE	5.46881e-06
Folate	rs17421511	0.00168609	7.17533e-06	TRUE	3.57677e-13	1.72935e-06	TRUE	1.87492e-13	5.71165e-06	TRUE	1.06742e-12	9.75977e-06	TRUE	3.23776e-12	1.43565e-06	TRUE	3.23906e-13	1.3777e-06	TRUE	6.05973e-13
	rs652197	0.0010674	1.89753e-06	TRUE	3.09718e-09	1.69498e-08	TRUE	1.7207e-09	3.85101e-07	TRUE	3.61807e-09	7.43861e-06	TRUE	3.84748e-08	2.81151e-06	TRUE	1.49403e-08	5.0491e-08	TRUE	4.7782e-09
Vitamin B12	rs1141321	0.00149655	5.22821e-06	TRUE	3.77152e-14	6.98416e-06	TRUE	3.09071e-13	1.13742e-07	TRUE	1.27204e-14	3.44694e-07	TRUE	2.29231e-14	5.81015e-06	TRUE	5.01124e-13	4.95943e-07	TRUE	9.00239e-14
	rs117456053	0.000790914	1.11599e-06	TRUE	1.83644e-08	6.60102e-06	TRUE	2.37148e-07	9.1976e-07	TRUE	4.78286e-08	7.86463e-06	TRUE	3.94475e-07	4.26883e-06	TRUE	2.1188e-07	2.42341e-06	TRUE	1.85641e-07
	rs1801222	0.0050945	2.29054e-06	TRUE	6.32724e-48	3.55035e-06	TRUE	5.54713e-45	NA	NA	NA	3.24427e-08	TRUE	2.85955e-46	1.11961e-05	TRUE	6.30773e-42	6.97888e-06	TRUE	1.40577e-41
	rs2336573	0.00499489	9.70119e-07	TRUE	1.07985e-47	1.33046e-06	TRUE	5.14902e-45	6.44687e-06	TRUE	8.46218e-43	6.10016e-09	TRUE	1.60467e-45	3.21093e-07	TRUE	2.07285e-44	3.27361e-06	TRUE	1.00003e-41
	rs34528912	0.00137978	3.8289e-07	TRUE	3.08382e-14	1.0551e-06	TRUE	2.76775e-13	1.84658e-06	TRUE	6.31488e-13	6.63274e-07	TRUE	3.36951e-13	8.69946e-07	TRUE	5.50644e-13	2.21485e-07	TRUE	6.10686e-13
	rs41281112	0.00250841	2.79237e-07	TRUE	6.50388e-25	3.9569e-07	TRUE	1.42733e-23	3.77801e-06	TRUE	3.64616e-22	1.18223e-07	TRUE	2.08439e-23	1.44108e-06	TRUE	2.04553e-22	5.00862e-07	TRUE	3.17553e-22
	rs56077122	0.00194061	6.54011e-06	TRUE	6.15103e-18	1.21841e-05	TRUE	2.28889e-16	2.97811e-05	TRUE	8.48566e-15	1.8886e-06	TRUE	1.20908e-17	7.58998e-06	TRUE	1.92501e-16	2.41917e-06	TRUE	7.27271e-17
	rs5753231	0.000830618	1.79598e-07	TRUE	3.56428e-09	2.54809e-06	TRUE	3.68436e-08	1.60627e-06	TRUE	3.06908e-08	1.05025e-06	TRUE	2.58114e-08	1.55025e-07	TRUE	1.50993e-08	5.10782e-07	TRUE	3.48278e-08
* SNPs with “TRUE” MR Steiger results suggest causality in the expected direction (ie, thoses explaining more variance in exposure than in outcome) and will not be removed. from the study.

## Sheet: Table S4
Table S4. The summary information for instrumental variables of outcomes.
Trait	SNP	EA	OA	Overall OA			Knee OA			Hip OA			Spine OA			Hand OA			Thumb OA
				beta	se	P	beta	se	P	beta	se	P	beta	se	P	beta	se	P	beta	se	P
Homocysteine	rs1801222	A	G	-0.0065	0.0047236	0.1688	-0.0088	0.00742113	0.2357	0	0	0.9985	-0.0011	0.010568	0.9171	-0.0233	0.012634	0.06515	-0.0224	0.0170454	0.1888
	rs12780845	A	G	0.0117	0.00486017	0.01607	0.0165	0.00757361	0.02936	0.0328	0.009671	0.0006949	0.0089	0.0108649	0.4127	0.0198	0.0128139	0.1223	0.0156	0.0176805	0.3776
	rs7130284	T	C	-0.0085	0.00842288	0.3129	-0.0218	0.0129254	0.09168	-0.0416	0.0166325	0.01238	-0.0039	0.0180891	0.8293	0.0061	0.0226733	0.7879	0.0067	0.0312996	0.8305
	rs957140	A	G	-0.0087	0.00454879	0.0558	-0.0052	0.00709638	0.4637	-0.0068	0.00897986	0.4489	0.0004	0.0108531	0.9706	-0.0032	0.012261	0.7941	-0.0273	0.0167241	0.1026
	rs12134663	A	C	-0.0154	0.00609314	0.01149	-0.008	0.00945521	0.3975	-0.0195	0.0120843	0.1066	-0.0228	0.0135029	0.09131	0.0104	0.0161191	0.5188	0.0107	0.0221664	0.6293
	rs2275565	T	G	-0.0039	0.00560051	0.4862	0.0042	0.00855825	0.6236	-0.0035	0.0108184	0.7463	0.0082	0.0120868	0.4975	0.0259	0.0147859	0.07983	0.0347	0.0203183	0.08767
	rs4660306	T	C	0.0014	0.00475222	0.7683	-0.0029	0.0074973	0.6989	0.01	0.00950768	0.2929	-0.0006	0.0109998	0.9565	0.0226	0.0127966	0.07738	0.0182	0.0175784	0.3005
	rs234709	T	C	-0.0015	0.00478066	0.7537	0.0004	0.00691922	0.9539	-0.0003	0.00916945	0.9739	-0.0052	0.0103948	0.6169	-0.0061	0.0141817	0.6671	-0.015	0.0208651	0.4722
	rs2851391	T	C	0.007	0.00465808	0.1329	0.0107	0.00715142	0.1346	0.0013	0.00889474	0.8838	0.0229	0.0101355	0.02386	0.0226	0.0129749	0.08154	0.0218	0.0183332	0.2344
	rs9369898	A	G	0.0088	0.00471215	0.06183	0.0116	0.00727859	0.111	0.0011	0.00938551	0.9067	0.0076	0.0103763	0.4639	0.0093	0.0125956	0.4603	0.0042	0.0174129	0.8094
	rs42648	A	G	-0.0016	0.00456381	0.7259	0.0049	0.00721922	0.4973	0.0095	0.00921167	0.3024	0.0012	0.0101297	0.9057	-0.0036	0.012335	0.7704	-0.0045	0.0169637	0.7908
Folate	rs652197	T	C	0.0083	0.00662692	0.2104	0.0008	0.00976408	0.9347	-0.0048	0.0130115	0.7122	0.0228	0.014466	0.115	0.0157	0.0169883	0.3554	0.0025	0.0223659	0.911
	rs17421511	A	G	0.0148	0.00607671	0.01487	0.0078	0.0094249	0.4079	0.017	0.0119658	0.1554	0.0242	0.0134046	0.07102	-0.0106	0.016051	0.509	-0.0129	0.0220935	0.5593
Vitamin B12	rs1801222	A	G	-0.0065	0.0047236	0.1688	-0.0088	0.00742113	0.2357	0	0	0.9985	-0.0011	0.010568	0.9171	-0.0233	0.012634	0.06515	-0.0224	0.0170454	0.1888
	rs56077122	A	C	-0.0114	0.00490275	0.02006	-0.0168	0.00764774	0.02804	-0.0316	0.0097406	0.001178	-0.0087	0.0109549	0.4271	-0.0197	0.0129737	0.1289	-0.0138	0.017836	0.4391
	rs117456053	A	G	0.02	0.0208223	0.3368	0.0552	0.0341394	0.1059	0.0235	0.0412198	0.5686	0.0786	0.0485001	0.1051	0.0603	0.052952	0.2548	0.0498	0.0643087	0.4387
	rs34528912	T	C	-0.0068	0.0120865	0.5737	-0.0123	0.0190275	0.518	0.0196	0.0242631	0.4192	-0.0126	0.0267722	0.6379	0.0166	0.032291	0.6072	-0.0104	0.0444237	0.8149
	rs41281112	T	C	0.0064	0.0133206	0.6309	-0.0085	0.0214716	0.6922	-0.0304	0.0263098	0.2479	-0.006	0.0301968	0.8425	0.0213	0.0321926	0.5082	-0.0147	0.0417553	0.7248
	rs2336573	T	C	0.0113	0.0126181	0.3705	-0.0143	0.0196997	0.4679	0.0384	0.0254408	0.1312	-0.0013	0.0288027	0.964	-0.0107	0.0342601	0.7548	0.0413	0.0458869	0.3681
	rs5753231	T	C	0.0021	0.00545001	0.7	0.0088	0.0087599	0.3151	0.0084	0.0111492	0.4512	-0.0074	0.0124953	0.5537	0.0033	0.0152066	0.8282	0.0073	0.0205333	0.7222
	rs1141321	T	C	0.0097	0.00466577	0.03762	0.0121	0.0072753	0.09628	0.0019	0.00947694	0.8411	-0.0035	0.010316	0.7344	0.0165	0.0124197	0.184	0.006	0.0171273	0.7261

## Sheet: Table S5
Table S5. Cochran's Q test for heterogeneity (MR-IVW).
Outcomes	Homocysteine			Folate			Vitamin B12
	Q	Q_df	Q_pval	Q	Q_df	Q_pval	Q	Q_df	Q_pval
Overall OA	12.0192	10	0.28377	0.0722599	1	0.788074	13.3379	7	0.0642906
Knee OA	12.0363	10	0.282636	0.157946	1	0.691055	10.8695	7	0.144413
Hip OA	14.0463	9	0.120686	1.17035	1	0.279328	15.6707	6	0.0156352
Spine OA	6.46364	10	0.774924	0.111255	1	0.73872	3.85454	7	0.796371
Hand OA	16.0658	10	0.0977649	1.28876	1	0.256276	9.37423	7	0.226893
Thumb OA	11.1756	10	0.344005	0.180754	1	0.670726	3.8619	7	0.795539

## Sheet: Table S6
Table S6. Assessing directional pleiotropy through MR-Egger intercept and MR-PRESSO test.
Exposures/Outcomes	MR-Egger intercept			MR-PRESSO
	Intercept	SE	P	Global test Pval	Distortion test Pval
Homocysteine
Overall OA	-0.00124735	0.00523993	0.817176	0.313	NA
Knee OA	-0.00611224	0.00790515	0.459231	0.294	NA
Hip OA	-0.0112217	0.0117889	0.369025	0.134	NA
Spine OA	-0.00534492	0.0100784	0.608714	0.764	NA
Hand OA	0.0121426	0.0158066	0.46205	0.124	NA
Thumb OA	0.0145635	0.0180889	0.441508	0.375	NA
Vitamin B12
Overall OA	-0.0104951	0.00592073	0.126667	0.067	NA
Knee OA	-0.00956142	0.00959919	0.357677	0.15	NA
Hip OA	-0.0263004	0.0132409	0.10374	0.033	0.324
Spine OA	0.0043982	0.0110638	0.704732	0.867	NA
Hand OA	-0.0100344	0.0160139	0.553997	0.224	NA
Thumb OA	-0.0163879	0.0179226	0.395781	0.765	NA
NA, no outliers were detected.

## Sheet: Table S7
Table S7.Weighted median and MR-Egger methods for genetic associations between exposures and outcomes.
Exposure	Outcomes	Methods	OR	Lower	Upper	P
Homocysteine	Overall OA	Weighted median Estimate	1.07436	1.00004	1.15421	0.0498802
		MR-Egger Estimate	1.12029	0.941177	1.33349	0.233246
	Knee OA	Weighted median Estimate	1.08755	0.9789	1.20827	0.11808
		MR-Egger Estimate	1.19059	0.917104	1.54564	0.222602
	Hip OA	Weighted median Estimate	1.15527	1.00055	1.33392	0.0491284
		MR-Egger Estimate	1.39472	0.951882	2.04357	0.126213
	Spine OA	Weighted median Estimate	1.07053	0.921052	1.24426	0.374441
		MR-Egger Estimate	1.20998	0.868238	1.68622	0.289453
	Hand OA	Weighted median Estimate	1.07133	0.88366	1.29885	0.483169
		MR-Egger Estimate	0.856244	0.505516	1.45031	0.57793
	Thumb OA	Weighted median Estimate	1.08255	0.839814	1.39544	0.540329
		MR-Egger Estimate	0.836077	0.456387	1.53165	0.576372
Vitamin B12	Overall OA	Weighted median Estimate	0.993846	0.938379	1.05259	0.833151
		MR-Egger Estimate	1.0693	0.961448	1.18925	0.262915
	Knee OA	Weighted median Estimate	0.951591	0.866961	1.04448	0.296413
		MR-Egger Estimate	1.0211	0.859517	1.21306	0.820104
	Hip OA	Weighted median Estimate	1.12318	0.98349	1.2827	0.0864711
		MR-Egger Estimate	1.21182	0.955751	1.5365	0.173526
	Spine OA	Weighted median Estimate	1.00128	0.892008	1.12393	0.982744
		MR-Egger Estimate	0.947644	0.77613	1.15706	0.616507
	Hand OA	Weighted median Estimate	0.963894	0.826035	1.12476	0.640505
		MR-Egger Estimate	1.05461	0.792174	1.40399	0.728184
	Thumb OA	Weighted median Estimate	1.10695	0.922005	1.32898	0.275997
		MR-Egger Estimate	1.18799	0.865221	1.63118	0.327847
